# Supplementary material for: Pedunculopontine glutamatergic neurons control spike patterning in substantia nigra dopaminergic neurons
Source: eLife. 2017 Oct 5;6:e30352. doi: 10.7554/eLife.30352 (PMC5643088; doi:10.7554/eLife.30352)
Supplement: Figure 1—figure supplement 2—source data 1. [file elife-30352-fig1-figsupp2-data1.xlsx]

## Sheet: S2
PPR		AMPA/NMDA
0.906135		2.28404
0.684885		1.28302
1.00948		2.08284
0.816938		3.02885
0.76071		1.30435
0.615799		1.14532
0.859641		2.27786
0.606077		3.62136
0.490968		2.19296
0.432829		2.06262
0.494356
0.889716
0.697931
0.795261
0.779219
0.634387
0.626475
0.456824
0.723613
0.699013		2.12832
0.162507		0.778677
