# Supplementary material for: Pedunculopontine glutamatergic neurons control spike patterning in substantia nigra dopaminergic neurons
Source: eLife. 2017 Oct 5;6:e30352. doi: 10.7554/eLife.30352 (PMC5643088; doi:10.7554/eLife.30352)
Supplement: Figure 1—source data 1. [file elife-30352-fig1-data1.xlsx]

## Sheet: 1E
PPR
0.886528
0.757641
0.932537
0.666457
1.02861
0.751091
0.754418
1.02911
0.781695
0.731285

## Sheet: 1F
AMPA	NMDA	Ratio
45.38	29.32	1.54775
45.76	39.72	1.15206
28.25	19.76	1.42966
23.41	22.87	1.02361
43.86	20.27	2.16379
57.53	33.26	1.72971
57.77	35.82	1.61279
138.81	95.55	1.45275
51.82	50.41	1.02797
75.55	81.68	0.924951
56.39	28.39	1.98626
50.04	29.3	1.70785
29.4	37.03	0.793951
