# Supplementary material for: Pedunculopontine glutamatergic neurons control spike patterning in substantia nigra dopaminergic neurons
Source: eLife. 2017 Oct 5;6:e30352. doi: 10.7554/eLife.30352 (PMC5643088; doi:10.7554/eLife.30352)
Supplement: Figure 2—source data 1. [file elife-30352-fig2-data1.xlsx]

## Sheet: 2A
	09.17.15 - Cell 1	09.17.15 - Cell 2	09.17.15 - Cell 3	09.17.15 - Cell 4	09.17.15 - Cell 5	09.21.15 - Cell 2	09.21.15 - Cell 5		Mean
-80	-1	-1	-1	-1	-1	-1	-1		-1
-70	-0.88312	-1.12431	-0.853132	-0.892796	-1.05865	-0.64838	-0.623104		-0.869071
-60	-0.732959	-0.714052	-0.831382	-0.783134	-0.934044	-0.713699	-0.68865		-0.771131
-50	-0.670736	-0.607959		-0.629496	-0.798095	-0.634885	-0.562681		-0.650642
-40	-0.507945	-0.408044	-0.65967	-0.461069	-0.553917	-0.741866	-0.333351		-0.523694
-30	-0.348454	-0.318205	-0.429662	-0.242948	-0.475615	-0.318374	-0.305163		-0.348346
-20	-0.199677	-0.21444	-0.319925	-0.137683	-0.21814	-0.513669	-0.226061		-0.261371
-10	-0.119386	-0.141665	-0.249714	-0.0629712	-0.186363	-0.143891	-0.214014		-0.159715
0	-0.0544129	-0.0609325	-0.103074	-0.0698076	-0.109164	-0.100431	0.139579		-0.0511775
10	-0.0230552	0.0295159	-0.015534	0.0572397	0.177853	0.104157	0.131866		0.0660061
20	0.0536472	0.103695	0.130076	0.12376	0.369413	0.107933	0.181006		0.15279
30	0.110454	0.18446	0.202654	0.188656	0.326284	0.209215	0.250881		0.210372
40	0.150691	0.262115	0.294335	0.265297	0.429563	0.125065	0.312564		0.262804
50	0.221999	0.315221	0.348126	0.358267		0.269582	0.378864		0.315343

## Sheet: 2B
Control	Drug	% Change
-270.176	-186.87	-30.834
-108.682	-96.354	-11.3432
-248.376	-208.627	-16.0036
-321.963	-229.042	-28.8608
-388.188	-411.408	5.98164
-120.796	-119.379	-1.17305

## Sheet: 2D
Ifenprodil
Control	Post-drug		% Change
140.807	104.308		-25.9212
209.297	77.5172		-62.9632
-143.367	-70.5163		-50.8142
-82.4246	-48.0138		-41.7482
-37.3162	-15.9791		-57.1791
-97.558	-76.8147		-21.2625
CIQ
Control	Post-drug		% Change
-176.81	-497.308		181.267
-230.272	-427.144		85.4951
-55.902	-123.558		121.025
-116.857	-155.662		33.2072
217.739	331.33		52.1685
191.614	276.211		44.1496
TCN201
Control	Post-drug		% Change
-218.001	-252.913		16.0147
-238.933	-174.519		-26.959
-71.2677	-86.1407		20.8692
-35.1312	-43.1627		22.8618
-35.1312	-38.5839		9.82812
-61.5934	-64.0085		3.92105

## Sheet: 2G
PPN_stim	Rubi_uncage
84.803	156.078
125.459	203.61
209.22	114.457
90.0786	145.836
186.76	209.716
