# Supplementary material for: Pedunculopontine glutamatergic neurons control spike patterning in substantia nigra dopaminergic neurons
Source: eLife. 2017 Oct 5;6:e30352. doi: 10.7554/eLife.30352 (PMC5643088; doi:10.7554/eLife.30352)
Supplement: Figure 3—figure supplement 1—source data 1. [file elife-30352-fig3-figsupp1-data1.xlsx]

## Sheet: S5B
distance							Avg
0.5	1	1	1	1	1	1	1
2.5	1.10102	0.929612	0.483513	0.745077	0.081881	0.707102	0.674701
5	0	0.415483	0.186396	0.736532	0.236943	0.172206	0.29126
7.5	0	0	0	0	0	0	0
10	0	0	0	0	0	0	0
