# Supplementary material for: Pedunculopontine glutamatergic neurons control spike patterning in substantia nigra dopaminergic neurons
Source: eLife. 2017 Oct 5;6:e30352. doi: 10.7554/eLife.30352 (PMC5643088; doi:10.7554/eLife.30352)
Supplement: Figure 3—source data 1. [file elife-30352-fig3-data1.xlsx]

## Sheet: Sheet1
	Response Frequency
distance	PPN	STN	Rubi		PPN	STN	Rubi
10	1	1	1		100	100	100
20	1	1	1		100	100	100
30	1	1	1		100	100	100
40	1	1	1		100	100	100
50	1	1	1		100	100	100
60	0.818182	1	1		81.8182	100	100
70	0.818182	1	1		81.8182	100	100
80	0.454545	1	1		45.4545	100	100
90	0.272727	1	1		27.2727	100	100
100	0.272727	1	1		27.2727	100	100
110	0	1	1		0	100	100
120	0	1	1		0	100	100
