# Supplementary material for: Pedunculopontine glutamatergic neurons control spike patterning in substantia nigra dopaminergic neurons
Source: eLife. 2017 Oct 5;6:e30352. doi: 10.7554/eLife.30352 (PMC5643088; doi:10.7554/eLife.30352)
Supplement: Figure 4—figure supplement 1—source data 1. [file elife-30352-fig4-figsupp1-data1.xlsx]

## Sheet: S3B
led_pwr	%respond
2	0.2
3	0.2
4	0.6
5	0.6
6	1
7	1
8	1
10	1
12	1
