# Supplementary material for: Pedunculopontine glutamatergic neurons control spike patterning in substantia nigra dopaminergic neurons
Source: eLife. 2017 Oct 5;6:e30352. doi: 10.7554/eLife.30352 (PMC5643088; doi:10.7554/eLife.30352)
Supplement: Figure 4—source data 1. [file elife-30352-fig4-data1.xlsx]

## Sheet: 4C
Stim_Freq	Actual _Stim_Freq	Cell_Freq
10	9.90099	8.433
10	9.90099	9.865
10	9.90099	9.8754
10	9.90099	9.852
10	9.90099	9.88579
10	9.90099	9.21609
10	9.90099	9.875
20	19.6078	20.04
20	19.6078	19.577
20	19.6078	19.2165
20	19.6078	19.6464
20	19.6078	19.7628
20	19.6078	19.2165
20	19.6078	19.5033
50	47.619	43.86
50	47.619	43.365
50	47.619	43.29
50	47.619	46.2963
50	47.619	43.29

## Sheet: 4F
10Hz
Baseline	Stim	CPP	NBQX
3.423	8.433	8.41	4.218
1.635	6.8596	6.146	1.0046
2.88	9.865	9.879	2.05
1.738	9.8754	9.2325	2.88602
2.9	9.852	9.875	3.375
1.236	9.88579		2.722
3.33906	9.21609
1.7094	7.37081
2.703	9.875
20Hz
Baseline	Stim	CPP	NBQX
5.20603	19.2165	19.2597	5.61738
2.3703	19.6464	19.4364	1.21485
4.98622	19.7628	19.685	3.08141
5.20603	19.2165	19.2597	5.61738
1.14939	19.5033	19.5703	1.01926
