# Supplementary material for: Pedunculopontine glutamatergic neurons control spike patterning in substantia nigra dopaminergic neurons
Source: eLife. 2017 Oct 5;6:e30352. doi: 10.7554/eLife.30352 (PMC5643088; doi:10.7554/eLife.30352)
Supplement: Figure 5—figure supplement 1—source data 1. [file elife-30352-fig5-figsupp1-data1.xlsx]

## Sheet: S4D
control	apamin	%change
0.6	0.9	0.5
0.4	0.7	0.75
0.6	0.9	0.5
0.4	1	1.5
0.6	1	0.666667

## Sheet: S4E
control	apamin	%change
0.832	1.287	0.546875
0.45	1.448	2.21778
0.549	1.349	1.45719
0.456	0.571	0.252193
0.47	0.818	0.740426
