# Supplementary material for: Pedunculopontine glutamatergic neurons control spike patterning in substantia nigra dopaminergic neurons
Source: eLife. 2017 Oct 5;6:e30352. doi: 10.7554/eLife.30352 (PMC5643088; doi:10.7554/eLife.30352)
Supplement: Figure 5—source data 1. [file elife-30352-fig5-data1.xlsx]

## Sheet: 5D
delta_t	stim_thresh	prior_thresh	delta_thresh
0.828334	-45.3796	-39.1174	-6.26221
0.310158	-51.7883	-39.2822	-12.5061
0.521465	-50.4639	-40.3564	-10.1074
0.698973	-47.5769	-40.1245	-7.45239
1.00712	-45.0378	-42.2607	-2.7771
1.04394	-42.1814	-41.8274	-0.354004
0.210685	-53.3813	-40.9485	-12.4329
0.433432	-51.7334	-41.1194	-10.614
0.664957	-46.875	-41.1804	-5.69458
0.0377411	-45.4712	-41.4795	-3.9917
0.0706165	-56.3293	-40.6128	-15.7166
0.911434	-45.4834	-42.5903	-2.89307
0.316665	-56.72	-41.6199	-15.1001
0.292089	-57.019	-42.6147	-14.4043
0.573436	-51.5503	-41.9617	-9.58862
0.954975	-42.4377	-42.9382	0.500488
0.126931	-60.4736	-41.864	-18.6096
0.383437	-55.9753	-42.926	-13.0493
0.136899	-63.1104	-43.5303	-19.5801
0.311732	-56.8359	-41.3147	-15.5212
0.832111	-46.814	-42.4988	-4.31519
0.350332	-55.0232	-42.2485	-12.7747
0.466289	-53.8025	-41.1255	-12.677
0.911099	-46.7346	-41.0522	-5.68237
0.994354	-43.988	-43.28	-0.708008
0.315122	-59.1858	-44.0674	-15.1184
0.49955	-56.6406	-43.5181	-13.1226
0.983944	-48.8892	-44.7754	-4.11377
0.717034	-54.0344	-44.7144	-9.32007
0.187906	-63.2874	-43.512	-19.7754
0.74728	-52.2583	-43.1152	-9.14307
0.566969	-53.1982	-42.45	-10.7483
0.397679	-55.9143	-41.7175	-14.1968
0.860608	-48.5901	-41.5344	-7.05566
0.957992	-46.7407	-42.3218	-4.41895
0.0903936	-63.1714	-40.0208	-23.1506
0.971498	-41.6504	-41.6321	-0.0183105
0.782153	-47.0276	-41.5771	-5.45044
0.498618	-50.8301	-39.3311	-11.499
0.214252	-57.1594	-40.1062	-17.0532
1.0229	-41.6382	-38.9282	-2.70996
0.366667	-51.8677	-40.9119	-10.9558
0.996959	-39.4043	-38.8977	-0.506592
0.297224	-53.54	-40.2649	-13.2751
0.929493	-40.3809	-40.0391	-0.341797
0.16162	-55.6213	-39.032	-16.5894
0.106343	-54.5227	-38.446	-16.0767
0.191342	-48.4314	-37.793	-10.6384
0.850111	-40.3259	-35.907	-4.41895
0.454095	-42.8772	-34.9731	-7.90405
0.926499	-39.1724	-36.8164	-2.35596
0.0472999	-36.6272	-33.783	-2.84424
0.251249	-55.2795	-43.5181	-11.7615
0.932115	-44.0674	-43.0298	-1.0376
0.640809	-52.356	-43.0298	-9.32617
0.769193	-47.2351	-42.8528	-4.38232
0.825407	-50.2441	-42.6819	-7.56226
0.351881	-56.7139	-42.6208	-14.093
0.583507	-51.6479	-43.3655	-8.28247
0.820779	-52.3254	-43.3472	-8.97827
1.05954	-47.5769	-42.6086	-4.96826
0.548093	-53.6438	-41.4001	-12.2437
0.0563109	-58.5144	-43.75	-14.7644
0.43626	-54.5776	-41.0767	-13.501
0.373466	-55.4443	-42.6514	-12.793
0.366747	-56.2256	-42.3218	-13.9038
0.749336	-50.708	-42.8833	-7.82471
0.786514	-48.8525	-42.4316	-6.4209
0.116137	-61.2854	-42.8467	-18.4387
0.118127	-61.2549	-43.0054	-18.2495
0.781666	-47.5647	-42.3035	-5.26123
0.298753	-56.4453	-42.5232	-13.9221
0.94631	-46.6248	-43.0664	-3.55835
0.162903	-59.0698	-39.9963	-19.0735
0.47887	-53.2654	-42.4744	-10.791
0.612711	-51.2634	-41.1072	-10.1562
0.474475	-54.3518	-40.8325	-13.5193
0.967501	-43.8904	-41.687	-2.20337
1.07318	-44.7571	-41.1011	-3.65601
0.941146	-42.3462	-40.387	-1.95923
0.674626	-52.5452	-42.4805	-10.0647
0.28732	-57.4219	-42.3218	-15.1001
0.844495	-49.2188	-43.3777	-5.84106
0.562135	-52.063	-41.2842	-10.7788
0.586546	-51.2939	-40.6189	-10.675
0.431286	-54.0955	-40.1367	-13.9587
0.784731	-48.3643	-39.856	-8.5083
0.117598	-61.9141	-39.093	-22.821
0.43912	-52.6733	-40.4602	-12.2131
0.223126	-58.3923	-42.3706	-16.0217
0.355632	-55.1941	-40.1489	-15.0452
0.507295	-53.3508	-39.4287	-13.9221
0.254023	-58.5449	-40.2954	-18.2495
0.767129	-49.0845	-38.7268	-10.3577
0.45126	-53.1189	-39.3127	-13.8062
0.39486	-55.1697	-40.6616	-14.5081
0.596524	-51.9897	-39.1052	-12.8845
1.00006	-43.2556	-38.7634	-4.49219
0.236824	-56.0486	-39.0076	-17.041
0.629807	-49.8901	-40.0696	-9.82056
0.916141	-43.8965	-38.6902	-5.2063
0.230635	-56.7932	-38.0798	-18.7134
0.653954	-50.5615	-38.1104	-12.4512
0.13333	-60.8276	-38.147	-22.6807
0.555473	-51.7517	-38.9648	-12.7869
0.831455	-46.7529	-36.9507	-9.80225
1.02143	-39.3494	-37.3901	-1.95923
0.158813	-58.6182	-37.9639	-20.6543
0.344692	-55.1453	-37.0972	-18.0481
0.328861	-54.3579	-37.3291	-17.0288
0.541447	-50.647	-39.1907	-11.4563
0.907272	-43.0481	-37.3352	-5.71289
0.0497236	-59.1248	-37.2681	-21.8567
0.609633	-48.7427	-37.4023	-11.3403
0.1329	-59.7351	-36.1389	-23.5962
0.881946	-44.3665	-36.7554	-7.61108
0.606998	-49.6521	-37.8479	-11.8042
0.376317	-53.6865	-36.8591	-16.8274
0.657202	-48.175	-36.2244	-11.9507
0.839947	-44.3787	-36.9446	-7.43408
0.782883	-46.6736	-36.4319	-10.2417
0.901344	-45.0684	-35.6384	-9.42993
0.708204	-46.1731	-37.5854	-8.58765
0.878112	-42.8894	-36.3342	-6.55518
0.705538	-43.7744	-33.1055	-10.6689
0.526648	-49.6033	-34.8389	-14.7644
0.496038	-49.9451	-34.7473	-15.1978
0.514471	-47.7173	-35.8643	-11.853
0.289925	-51.8616	-35.1196	-16.7419
0.369749	-51.2695	-34.2407	-17.0288
0.640489	-46.4966	-32.9895	-13.5071
1.00183	-38.8916	-35.4309	-3.46069
0.135422	-56.0303	-33.844	-22.1863
0.211794	-51.8311	-34.3262	-17.5049
0.123899	-55.8289	-33.9111	-21.9177
0.108359	-55.6274	-30.8594	-24.7681
0.811834	-40.1001	-33.4045	-6.69556
0.0882911	-56.1584	-32.6599	-23.4985
1.33305	-37.0422	-32.9834	-4.05884
0.767164	-39.679	-32.0801	-7.59888
0.556939	-45.7947	-33.0994	-12.6953
0.896026	-37.8906	-32.6294	-5.26123
0.328109	-48.9319	-33.0811	-15.8508
0.518766	-50.0244	-35.675	-14.3494
0.0529904	-55.0781	-37.0239	-18.0542
0.624941	-51.9348	-37.5366	-14.3982
0.359227	-55.4871	-38.2385	-17.2485
0.596355	-49.1394	-36.2488	-12.8906
0.180702	-52.2034	-36.4624	-15.741
0.0377509	-48.4863	-36.8347	-11.6516
0.950592	-37.3962	-35.907	-1.48926
0.656482	-49.7192	-36.7676	-12.9517
0.148526	-55.5176	-36.9751	-18.5425
0.155159	-55.7068	-36.7859	-18.9209
0.818118	-44.5496	-37.3413	-7.20825
0.0898876	-53.125	-36.6821	-16.4429
0.719222	-43.3899	-38.0188	-5.37109
0.29513	-52.0142	-35.26	-16.7542
0.98297	-42.9138	-37.8357	-5.07812
0.548237	-50.3052	-36.9141	-13.3911
0.232991	-55.0476	-36.8896	-18.158
0.892623	-42.3828	-36.4075	-5.97534
0.674139	-49.7742	-37.5244	-12.2498
0.343475	-52.9663	-36.0657	-16.9006
0.199118	-54.6631	-36.6821	-17.981
0.999029	-41.9861	-36.0229	-5.96313
0.411265	-54.2358	-35.1074	-19.1284
1.53288	-46.1487	-36.7004	-9.44824
0.977691	-38.5254	-36.792	-1.7334
0.465869	-52.301	-37.2192	-15.0818
0.441874	-53.7476	-36.5967	-17.1509
0.776081	-44.873	-38.8	-6.073
0.66566	-48.6389	-37.207	-11.4319
0.688138	-49.7803	-33.5815	-16.1987
0.893842	-44.2322	-39.563	-4.66919
0.423891	-52.9663	-35.6689	-17.2974
1.06529	-42.3767	-34.3628	-8.01392
1.20876	-42.2668	-34.9915	-7.27539
0.83919	-52.8137	-44.1223	-8.69141
0.71717	-58.2275	-43.158	-15.0696
0.677338	-56.4392	-43.689	-12.7502
0.161303	-61.2793	-44.5557	-16.7236
0.671936	-58.9905	-44.4885	-14.502
0.418915	-61.6028	-44.0491	-17.5537
0.816282	-56.3049	-44.2749	-12.03
0.622373	-61.4624	-43.9148	-17.5476
0.44079	-65.1428	-44.2078	-20.9351
0.685049	-60.6323	-43.5486	-17.0837
0.354931	-63.9832	-43.7134	-20.2698
0.642221	-57.1655	-43.0176	-14.1479
0.945737	-53.6987	-43.5303	-10.1685
0.719796	-59.8572	-43.7378	-16.1194
0.69196	-58.7769	-43.927	-14.8499
0.167881	-65.5579	-44.2261	-21.3318
0.996127	-51.4587	-43.5913	-7.86743
0.576466	-59.1492	-43.2495	-15.8997
0.264953	-65.8264	-44.0979	-21.7285
0.900839	-50.1648	-43.5608	-6.604
0.552347	-58.2092	-42.7063	-15.5029
0.506396	-59.4543	-42.1326	-17.3218
0.575546	-56.3354	-42.5781	-13.7573
0.95563	-42.4927	-42.7429	0.250244
0.905176	-54.4617	-42.8711	-11.5906
0.178269	-65.387	-43.7256	-21.6614
0.964857	-50.3845	-42.8528	-7.53174
0.355506	-61.8225	-42.8955	-18.927
0.464988	-60.553	-41.9861	-18.5669
0.619763	-59.0088	-43.0542	-15.9546
0.122108	-66.2231	-42.9138	-23.3093
0.425597	-61.0046	-42.5598	-18.4448
0.696472	-55.3284	-42.3279	-13.0005
0.558435	-59.613	-43.2739	-16.3391
0.982885	-52.3315	-43.2495	-9.08203
0.121198	-67.5964	-43.2556	-24.3408
0.0770807	-67.8406	-43.8843	-23.9563
0.584523	-59.0515	-43.0847	-15.9668
0.889131	-55.3955	-44.0552	-11.3403
0.186855	-63.1531	-43.6218	-19.5312
0.0976341	-47.4976	-44.0369	-3.46069
0.695964	-56.4148	-43.3838	-13.031
0.757135	-55.1208	-42.5476	-12.5732
0.760021	-54.2969	-42.9443	-11.3525
0.309801	-61.1511	-43.4143	-17.7368
1.01595	-47.9309	-42.3279	-5.60303
0.633499	-56.2317	-43.811	-12.4207
0.808785	-53.1189	-44.1345	-8.98438
0.792387	-54.248	-45.0439	-9.2041
0.524082	-58.4045	-44.4275	-13.9771
0.46096	-58.2336	-44.397	-13.8367
0.106687	-63.8184	-44.5984	-19.22
0.927851	-49.7009	-43.9697	-5.7312
0.0795088	-45.3064	-44.6899	-0.616455
0.293349	-63.7451	-45.813	-17.9321
0.240329	-61.9507	-43.8416	-18.1091
0.490217	-56.7749	-42.5354	-14.2395
0.357688	-58.1665	-43.1152	-15.0513
0.0845864	-62.2986	-44.2505	-18.0481
0.715265	-54.48	-43.1763	-11.3037
0.707462	-53.717	-42.9993	-10.7178
0.447688	-56.189	-42.7673	-13.4216
0.548448	-55.1758	-42.6147	-12.561
0.543689	-55.4077	-42.6392	-12.7686
0.150389	-44.5251	-41.8335	-2.69165
0.740154	-53.4485	-43.6218	-9.82666
0.947965	-47.2839	-42.7795	-4.50439
0.107123	-48.2788	-41.7969	-6.48193
0.755158	-50.8667	-41.3025	-9.56421
0.547257	-53.7964	-41.6504	-12.146
0.563221	-53.5522	-42.4255	-11.1267
0.561576	-51.9775	-40.8875	-11.0901
0.256587	-56.4697	-41.8091	-14.6606
0.821204	-51.3184	-42.7612	-8.55713
0.257313	-56.3049	-41.1621	-15.1428
0.860417	-46.1182	-39.8804	-6.23779
0.434242	-53.3325	-40.9546	-12.3779
0.927909	-46.4661	-40.7654	-5.70068
0.502908	-52.3438	-40.3564	-11.9873
0.881603	-46.7102	-39.7644	-6.9458
0.418016	-52.0264	-40.2588	-11.7676

## Sheet: 5E
delta_t	stim_peak	prior_peak	delta_peak
0.828334	-18.7927	-16.6138	-2.17896
0.310158	-23.6633	-17.3767	-6.28662
0.521465	-22.2168	-17.1814	-5.0354
0.698973	-19.7998	-17.041	-2.75879
1.00712	-17.8467	-16.5222	-1.32446
1.04394	-13.5986	-14.0869	0.488281
0.210685	-21.6614	-14.9353	-6.72607
0.433432	-20.7825	-15.5457	-5.23682
0.664957	-17.45	-15.0879	-2.36206
0.0377411	-20.5933	-15.3015	-5.29175
0.0706165	-17.8711	-13.0493	-4.82178
0.911434	-14.7339	-13.7817	-0.952148
0.316665	-19.3542	-12.4817	-6.87256
0.292089	-20.1965	-14.502	-5.69458
0.573436	-15.6799	-12.2375	-3.44238
0.954975	-10.7239	-10.9497	0.22583
0.126931	-18.2068	-12.7563	-5.45044
0.383437	-16.4062	-11.1328	-5.27344
0.136899	-16.6809	-11.3708	-5.31006
0.311732	-15.1855	-9.28955	-5.896
0.832111	-10.6445	-10.083	-0.561523
0.350332	-14.3799	-8.35571	-6.02417
0.466289	-9.97925	-7.04956	-2.92969
0.911099	-7.09229	-6.31714	-0.775146
0.994354	-9.64355	-9.68628	0.0427246
0.315122	-15.3137	-9.79004	-5.52368
0.49955	-15.0879	-11.0046	-4.08325
0.983944	-10.5042	-10.2539	-0.250244
0.717034	-11.0779	-9.27734	-1.80054
0.187906	-15.1917	-7.49512	-7.69653
0.74728	-8.39844	-6.00586	-2.39258
0.566969	-8.10547	-3.80859	-4.29688
0.397679	-11.0413	-3.17993	-7.86133
0.860608	-4.96216	-4.19922	-0.762939
0.957992	-4.29688	-3.52783	-0.769043
0.0903936	-8.5022	-3.46069	-5.0415
0.971498	-6.45142	-5.86548	-0.585938
0.782153	-11.2549	-9.77173	-1.48315
0.498618	-21.5698	-14.3982	-7.17163
0.214252	-26.6663	-14.8804	-11.7859
1.0229	-18.4265	-16.5833	-1.84326
0.366667	-29.8279	-20.7458	-9.08203
0.996959	-20.0195	-19.6289	-0.390625
0.297224	-34.0027	-21.7529	-12.2498
0.929493	-24.1211	-23.3826	-0.738525
0.16162	-36.9812	-23.7366	-13.2446
0.106343	-35.6323	-24.3591	-11.2732
0.191342	-38.2385	-27.1484	-11.0901
0.850111	-29.541	-25.7263	-3.8147
0.454095	-33.02	-25.3418	-7.67822
0.926499	-28.9734	-27.4597	-1.51367
0.0472999	-28.2532	-25.061	-3.19214
0.251249	-40.3931	-28.4607	-11.9324
0.932115	-26.9531	-26.3306	-0.622559
0.640809	-32.8186	-24.6826	-8.13599
0.769193	-25.2014	-22.0825	-3.1189
0.825407	-25.769	-20.1782	-5.59082
0.351881	-28.6011	-18.4814	-10.1196
0.583507	-22.7356	-17.5781	-5.15747
0.820779	-21.7773	-16.0461	-5.7312
1.05954	-16.333	-14.5752	-1.75781
0.548093	-19.281	-12.4573	-6.82373
0.0563109	-17.5781	-11.6455	-5.93262
0.43626	-17.9199	-10.2966	-7.62329
0.373466	-16.217	-9.24072	-6.97632
0.366747	-15.6128	-8.22144	-7.39136
0.749336	-10.6995	-7.92847	-2.771
0.786514	-8.63037	-6.23779	-2.39258
0.116137	-10.3943	-5.9082	-4.48608
0.118127	-9.57642	-4.99268	-4.58374
0.781666	-4.74243	-3.75366	-0.98877
0.298753	-8.97217	-3.51562	-5.45654
0.94631	-2.47803	-2.14844	-0.32959
0.162903	-5.68237	-1.40381	-4.27856
0.47887	-5.16357	-1.95923	-3.20435
0.612711	-3.40576	-0.793457	-2.6123
0.474475	-5.39551	-0.0671387	-5.32837
0.967501	-0.0183105	-0.408936	0.390625
1.07318	0.793457	0.915527	-0.12207
0.941146	1.32446	1.09253	0.231934
0.674626	-2.49023	0.57373	-3.06396
0.28732	-4.90723	1.15356	-6.06079
0.844495	1.48315	2.16064	-0.67749
0.562135	-1.33057	3.77808	-5.10864
0.586546	1.42212	3.97949	-2.55737
0.431286	-0.994873	4.46167	-5.45654
0.784731	3.80249	4.28467	-0.482178
0.117598	0.524902	5.16968	-4.64478
0.43912	1.45874	5.32227	-3.86353
0.223126	-1.64185	5.9082	-7.55005
0.355632	-0.238037	5.30396	-5.54199
0.507295	1.13525	5.47485	-4.3396
0.254023	-1.50146	6.08521	-7.58667
0.767129	4.97437	5.86548	-0.891113
0.45126	1.0498	6.01807	-4.96826
0.39486	0.305176	6.50024	-6.19507
0.596524	3.31421	6.61011	-3.2959
1.00006	8.30078	7.75146	0.549316
0.236824	2.90527	8.37402	-5.46875
0.629807	5.70679	8.14819	-2.44141
0.916141	10.4492	9.57031	0.878906
0.230635	3.94897	10.2112	-6.26221
0.653954	6.45752	10.5957	-4.13818
0.13333	4.71802	10.1501	-5.43213
0.555473	5.3833	10.4187	-5.0354
0.831455	9.87549	10.4248	-0.549316
1.02143	10.8032	10.6445	0.158691
0.158813	4.92554	11.084	-6.15845
0.344692	3.10669	10.9497	-7.84302
0.328861	3.75366	11.2	-7.44629
0.541447	6.20117	9.67407	-3.4729
0.907272	11.1938	10.5957	0.598145
0.0497236	4.88281	10.2722	-5.3894
0.609633	7.03735	10.2356	-3.19824
0.1329	3.80249	8.37402	-4.57153
0.881946	10.5042	10.4675	0.0366211
0.606998	6.67114	10.1379	-3.4668
0.376317	1.98975	9.94873	-7.95898
0.657202	7.35474	10.1257	-2.771
0.839947	10.5103	9.92432	0.585938
0.782883	8.54492	9.3811	-0.836182
0.901344	10.907	9.25293	1.65405
0.708204	9.34448	9.552	-0.20752
0.878112	9.63135	7.84302	1.78833
0.705538	11.4746	9.05151	2.4231
0.526648	9.63745	11.4624	-1.82495
0.496038	8.94775	12.0667	-3.1189
0.514471	10.7544	12.6465	-1.89209
0.289925	8.27637	11.4197	-3.14331
0.369749	7.58057	10.5042	-2.92358
0.640489	11.5356	9.3689	2.16675
1.00183	12.1216	11.5356	0.585938
0.135422	9.43604	10.791	-1.35498
0.211794	8.5144	11.2549	-2.74048
0.123899	8.62427	10.8215	-2.19727
0.108359	10.791	10.675	0.115967
0.811834	13.9038	11.8591	2.04468
0.0882911	10.9741	11.2183	-0.244141
1.33305	12.3291	11.2	1.12915
0.767164	14.2273	9.74731	4.47998
0.556939	13.2874	11.1206	2.16675
0.896026	11.9568	10.0342	1.92261
0.328109	10.6873	10.2417	0.445557
0.518766	-20.2515	-10.9375	-9.31396
0.0529904	-13.0371	-7.44629	-5.59082
0.624941	-15.4419	-4.98657	-10.4553
0.359227	-14.5569	-1.05591	-13.501
0.596355	-3.94287	0.805664	-4.74854
0.180702	-1.57471	1.23291	-2.80762
0.0377509	-6.10962	1.95923	-8.06885
0.950592	3.49121	1.88599	1.60522
0.656482	1.00708	2.73438	-1.72729
0.148526	0.958252	4.18701	-3.22876
0.155159	0.323486	4.62646	-4.30298
0.818118	5.58472	4.39453	1.19019
0.0898876	3.24707	3.84521	-0.598145
0.719222	6.31104	3.88794	2.4231
0.29513	2.53906	3.68652	-1.14746
0.98297	5.60913	3.2959	2.31323
0.548237	3.21655	3.28369	-0.0671387
0.232991	1.01318	2.39868	-1.3855
0.892623	5.85938	2.19727	3.66211
0.674139	4.24194	2.59399	1.64795
0.343475	2.63062	2.04468	0.585938
0.199118	1.89819	2.00806	-0.109863
0.999029	5.32227	2.65503	2.66724
0.411265	-0.427246	1.7334	-2.16064
1.53288	7.32422	2.57568	4.74854
0.977691	4.90112	2.99683	1.9043
0.465869	3.00903	3.57056	-0.561523
0.441874	0.811768	2.70386	-1.89209
0.776081	5.83496	3.4668	2.36816
0.66566	4.50439	1.19629	3.30811
0.688138	3.58276	-1.97754	5.5603
0.893842	5.48096	3.39966	2.0813
0.423891	1.80054	2.63062	-0.830078
1.06529	3.302	-1.29395	4.59595
1.20876	2.40479	-0.146484	2.55127
0.83919	-38.1104	-31.6345	-6.47583
0.71717	-38.8306	-28.6865	-10.144
0.677338	-37.5061	-28.1982	-9.30786
0.671936	-34.3872	-25.4578	-8.92944
0.418915	-33.8867	-24.1516	-9.73511
0.816282	-28.3569	-22.7844	-5.57251
0.622373	-28.6011	-20.343	-8.25806
0.685049	-25.3601	-18.158	-7.20215
0.354931	-26.178	-17.1753	-9.00269
0.642221	-21.4233	-17.3523	-4.07104
0.945737	-19.0247	-16.1987	-2.82593
0.719796	-20.7825	-16.272	-4.5105
0.69196	-20.166	-15.0391	-5.12695
0.996127	-16.2476	-14.5813	-1.66626
0.576466	-18.5242	-13.9587	-4.56543
0.264953	-23.2727	-14.7339	-8.53882
0.900839	-16.1133	-14.5752	-1.53809
0.552347	-17.7307	-13.2568	-4.47388
0.506396	-17.0898	-12.561	-4.52881
0.575546	-15.1062	-12.3169	-2.78931
0.95563	-12.4756	-12.9578	0.482178
0.905176	-15.8691	-12.7014	-3.16772
0.178269	-20.1172	-13.5498	-6.56738
0.964857	-14.801	-13.4399	-1.36108
0.355506	-17.2363	-12.5854	-4.65088
0.464988	-17.6514	-12.2009	-5.45044
0.619763	-16.9739	-12.4451	-4.52881
0.122108	-18.5181	-12.3535	-6.16455
0.425597	-17.9993	-12.1643	-5.83496
0.696472	-14.5691	-11.5234	-3.04565
0.558435	-17.926	-12.7808	-5.14526
0.982885	-15.8142	-13.916	-1.89819
0.121198	-18.8171	-13.3118	-5.50537
0.0770807	-19.5801	-14.0686	-5.51147
0.584523	-17.4683	-13.7024	-3.76587
0.889131	-16.6931	-14.2517	-2.44141
0.186855	-18.5669	-14.9109	-3.65601
0.0976341	-19.2139	-14.9231	-4.29077
0.695964	-17.6025	-14.4348	-3.16772
0.757135	-16.8579	-14.624	-2.23389
0.760021	-16.1987	-13.5864	-2.6123
0.309801	-18.8721	-13.1104	-5.76172
1.01595	-14.8315	-14.6729	-0.158691
0.633499	-16.6626	-14.5142	-2.14844
0.808785	-15.9973	-15.4602	-0.537109
0.792387	-18.4021	-17.1448	-1.25732
0.524082	-19.1345	-16.4917	-2.64282
0.46096	-18.9392	-16.1804	-2.75879
0.106687	-20.7214	-16.0583	-4.66309
0.927851	-16.9861	-15.5029	-1.48315
0.0795088	-21.2708	-16.8457	-4.42505
0.293349	-25.0244	-18.6646	-6.35986
0.240329	-20.8801	-15.387	-5.49316
0.490217	-15.4846	-12.4329	-3.05176
0.357688	-16.7786	-13.0432	-3.73535
0.0845864	-19.8059	-16.1377	-3.66821
0.715265	-16.7969	-15.5579	-1.23901
0.707462	-16.4673	-15.155	-1.31226
0.447688	-17.865	-15.1794	-2.68555
0.548448	-16.6687	-14.2883	-2.38037
0.543689	-16.5283	-14.7034	-1.82495
0.150389	-16.2903	-13.5986	-2.69165
0.740154	-17.2729	-15.6128	-1.66016
0.947965	-15.2954	-15.1062	-0.189209
0.107123	-17.0837	-13.0615	-4.02222
0.755158	-11.9141	-11.5112	-0.402832
0.547257	-14.8499	-13.7573	-1.09253
0.563221	-15.7471	-14.6606	-1.08643
0.561576	-13.9038	-13.6292	-0.274658
0.256587	-15.8691	-14.2944	-1.57471
0.821204	-16.5649	-16.3025	-0.262451
0.257313	-15.2771	-13.3179	-1.95923
0.860417	-12.2803	-12.8601	0.579834
0.434242	-14.5386	-14.1907	-0.3479
0.927909	-13.9099	-13.678	-0.231934
0.502908	-13.8794	-13.5315	-0.3479
0.881603	-12.1521	-12.3474	0.195312
0.418016	-14.0381	-13.8	-0.238037

## Sheet: 5F
delta_t	next_spike_t	stim_t	mean_isi	next_spike_delta_norm	next_spike_delta
0.828334	1.84772	1.50672	0.36338	0.938412	0.341
0.310158	1.93942	1.50764	0.36246	1.19125	0.43178
0.521465	1.96688	1.50704	0.345373	1.33143	0.45984
0.698973	1.94064	1.50666	0.402533	1.07812	0.43398
1.00712	2.04784	1.50658	0.395187	1.36963	0.54126
1.04394	1.94542	1.50618	0.45656	0.962064	0.43924
0.210685	2.00294	1.50808	0.32456	1.52471	0.49486
0.433432	1.92854	1.50676	0.32711	1.28941	0.42178
0.664957	1.91772	1.5065	0.396507	1.03711	0.41122
0.0706165	2.0146	1.50894	0.328535	1.53914	0.50566
0.911434	1.93914	1.50576	0.43448	0.997468	0.43338
0.316665	1.9527	1.50698	0.342065	1.30303	0.44572
0.292089	2.0096	1.50688	0.366875	1.37028	0.50272
0.573436	1.91834	1.50682	0.344415	1.19484	0.41152
0.954975	1.90258	1.50574	0.450567	0.880758	0.39684
0.126931	2.00784	1.50748	0.337665	1.48182	0.50036
0.383437	1.89286	1.50662	0.34269	1.12708	0.38624
0.136899	2.04102	1.5082	0.34215	1.55727	0.53282
0.311732	1.9698	1.5065	0.32406	1.42967	0.4633
0.832111	1.81856	1.50602	0.359375	0.869677	0.31254
0.350332	1.92792	1.50624	0.342475	1.23127	0.42168
0.466289	1.9704	1.50702	0.35686	1.29849	0.46338
0.911099	1.89486	1.50618	0.40472	0.960368	0.38868
0.994354	1.71442	1.50496	0.294744	0.710651	0.20946
0.315122	1.8112	1.50514	0.246444	1.2419	0.30606
0.49955	1.71228	1.5046	0.203303	1.02153	0.20768
0.983944	1.68162	1.50414	0.207491	0.855361	0.17748
0.717034	1.70372	1.50484	0.207466	0.958616	0.19888
0.187906	1.77574	1.50572	0.202654	1.33242	0.27002
0.74728	1.74956	1.50454	0.253292	0.967342	0.24502
0.566969	1.73758	1.505	0.26012	0.894126	0.23258
0.397679	1.80686	1.50534	0.28088	1.07348	0.30152
0.860608	1.8045	1.50496	0.302205	0.991181	0.29954
0.957992	1.79744	1.50476	0.324345	0.902372	0.29268
0.0903936	1.8605	1.5071	0.251124	1.40727	0.3534
0.971498	1.76952	1.50452	0.340505	0.778256	0.265
0.782153	1.79402	1.50508	0.34382	0.840382	0.28894
0.498618	1.82068	1.50538	0.298545	1.05612	0.3153
0.214252	1.859	1.50562	0.2947	1.19912	0.35338
1.0229	1.78514	1.5054	0.374955	0.746063	0.27974
0.366667	1.8698	1.50576	0.3006	1.21104	0.36404
0.996959	1.9431	1.50026	0.383607	1.15441	0.44284
0.297224	1.85082	1.50564	0.28995	1.19048	0.34518
0.929493	1.8099	1.50502	0.37046	0.822977	0.30488
0.16162	1.8819	1.50564	0.29526	1.27433	0.37626
0.106343	1.86798	1.50608	0.280036	1.29233	0.3619
0.191342	1.87506	1.50642	0.28828	1.27876	0.36864
0.850111	1.78518	1.50526	0.322005	0.869303	0.27992
0.454095	1.81846	1.50566	0.31271	1.00029	0.3128
0.926499	1.8332	1.50538	0.333125	0.984075	0.32782
0.0472999	1.94384	1.50972	0.276956	1.56747	0.43412
0.251249	2.72546	2.50466	0.222011	0.994546	0.2208
0.932115	2.66608	2.50406	0.222462	0.728305	0.16202
0.640809	2.69714	2.50454	0.226276	0.851172	0.1926
0.769193	2.68514	2.50422	0.223871	0.808144	0.18092
0.825407	2.68988	2.5042	0.237192	0.782826	0.18568
0.351881	2.65504	2.5045	0.195805	0.768826	0.15054
0.583507	2.63812	2.50436	0.189749	0.70493	0.13376
0.820779	2.66194	2.50426	0.203538	0.774694	0.15768
1.05954	2.62486	2.504	0.20373	0.593236	0.12086
0.548093	2.63812	2.5043	0.186611	0.717108	0.13382
0.0563109	2.75002	2.50564	0.19712	1.23975	0.24438
0.43626	2.65982	2.5042	0.20254	0.768342	0.15562
0.373466	2.64446	2.50442	0.181757	0.77048	0.14004
0.366747	2.65716	2.50448	0.199102	0.766844	0.15268
0.749336	2.62946	2.50438	0.187072	0.668618	0.12508
0.786514	2.6552	2.50404	0.21088	0.716806	0.15116
0.116137	2.71334	2.50506	0.185298	1.12402	0.20828
0.118127	2.77374	2.50498	0.198938	1.35097	0.26876
0.781666	2.64896	2.50408	0.22232	0.651673	0.14488
0.298753	2.69872	2.50478	0.19414	0.99897	0.19394
0.94631	2.67836	2.50408	0.222253	0.784152	0.17428
0.162903	2.68198	2.5053	0.169426	1.04282	0.17668
0.47887	2.6976	2.5045	0.201725	0.957244	0.1931
0.612711	2.65244	2.50426	0.206753	0.716699	0.14818
0.474475	2.65502	2.50428	0.214047	0.704237	0.15074
0.967501	2.65086	2.50374	0.215276	0.683401	0.14712
1.07318	2.63828	2.50398	0.207197	0.648176	0.1343
0.941146	2.6452	2.504	0.204772	0.689549	0.1412
0.674626	2.66086	2.50414	0.207167	0.756492	0.15672
0.28732	2.65426	2.5044	0.198107	0.756461	0.14986
0.844495	2.69426	2.50408	0.23041	0.825398	0.19018
0.562135	2.6958	2.50462	0.237096	0.80634	0.19118
0.586546	2.66336	2.50468	0.201348	0.788087	0.15868
0.431286	2.68036	2.5046	0.21262	0.826639	0.17576
0.784731	2.67658	2.50438	0.214953	0.801106	0.1722
0.117598	2.78356	2.50578	0.211909	1.31085	0.27778
0.43912	2.67874	2.50444	0.2137	0.815629	0.1743
0.223126	2.71824	2.5051	0.215215	0.990361	0.21314
0.355632	2.67702	2.5043	0.207687	0.831637	0.17272
0.507295	2.71124	2.50422	0.220818	0.937513	0.20702
0.254023	2.66518	2.5046	0.203603	0.78869	0.16058
0.767129	2.66764	2.50424	0.208127	0.785099	0.1634
0.45126	2.67546	2.5043	0.20671	0.82802	0.17116
0.39486	2.64996	2.50432	0.20078	0.725371	0.14564
0.596524	2.67628	2.50412	0.211525	0.813897	0.17216
1.00006	2.6775	2.5039	0.210927	0.823032	0.1736
0.236824	2.70908	2.50462	0.209016	0.978201	0.20446
0.629807	2.68098	2.5042	0.207333	0.852637	0.17678
0.916141	2.68354	2.50402	0.221735	0.809617	0.17952
0.230635	2.68748	2.50478	0.203958	0.895771	0.1827
0.653954	2.65376	2.50404	0.223869	0.668784	0.14972
0.13333	2.74842	2.5053	0.205205	1.18477	0.24312
0.555473	2.64994	2.5039	0.210847	0.692634	0.14604
0.831455	2.63208	2.50386	0.221371	0.579209	0.12822
1.02143	2.66702	2.5005	0.220809	0.754136	0.16652
0.158813	2.72226	2.50476	0.208673	1.0423	0.2175
0.344692	2.68076	2.50416	0.217585	0.811635	0.1766
0.328861	2.66546	2.50434	0.20422	0.788953	0.16112
0.541447	2.66748	2.5043	0.215238	0.758137	0.16318
0.907272	2.66828	2.50384	0.231882	0.709154	0.16444
0.0497236	2.8058	2.5065	0.223636	1.33833	0.2993
0.609633	2.66622	2.50434	0.239062	0.677147	0.16188
0.1329	2.7599	2.50564	0.213544	1.19067	0.25426
0.881946	2.70286	2.50398	0.257113	0.773511	0.19888
0.606998	2.68028	2.50422	0.235882	0.74639	0.17606
0.376317	2.6838	2.50436	0.2221	0.807924	0.17944
0.657202	2.66022	2.50398	0.221758	0.704551	0.15624
0.839947	2.66466	2.50394	0.231848	0.693213	0.16072
0.782883	2.67616	2.50394	0.213953	0.804944	0.17222
0.901344	2.65364	2.50422	0.216233	0.691015	0.14942
0.708204	2.6758	2.50412	0.223749	0.767288	0.17168
0.878112	2.6939	2.50396	0.219471	0.865445	0.18994
0.705538	2.73362	2.5041	0.248718	0.922812	0.22952
0.526648	2.71364	2.50444	0.228008	0.917512	0.2092
0.496038	2.69852	2.50454	0.232482	0.834387	0.19398
0.514471	2.71184	2.50458	0.255291	0.811857	0.20726
0.289925	2.69156	2.50464	0.228956	0.816401	0.18692
0.369749	2.72956	2.50454	0.217553	1.03432	0.22502
0.640489	2.70342	2.50438	0.22258	0.89424	0.19904
1.00183	2.68784	2.5041	0.212391	0.865103	0.18374
0.135422	3.18792	2.5054	0.205875	3.31522	0.68252
0.211794	2.9819	2.50488	0.256098	1.86265	0.47702
0.123899	2.78234	2.50524	0.250042	1.10821	0.2771
0.108359	2.907	2.50632	0.226838	1.76637	0.40068
0.811834	2.70264	2.50426	0.249386	0.795474	0.19838
0.0882911	2.77364	2.5067	0.267071	0.999509	0.26694
1.33305	2.72814	2.50468	0.30701	0.727859	0.22346
0.767164	2.7204	2.50432	0.268678	0.804235	0.21608
0.556939	2.70168	2.50438	0.276153	0.71446	0.1973
0.896026	2.70362	2.50448	0.29267	0.680425	0.19914
0.328109	2.7638	2.50454	0.332329	0.780132	0.25926
0.518766	2.82082	2.50426	0.30854	1.02599	0.31656
0.0529904	3.09654	2.5049	0.37403	1.5818	0.59164
0.624941	2.86832	2.50386	0.377123	0.966421	0.36446
0.359227	2.93974	2.50412	0.36328	1.19913	0.43562
0.596355	2.83854	2.50402	0.331749	1.00835	0.33452
0.180702	2.9041	2.50442	0.271607	1.47154	0.39968
0.0377509	2.90164	2.50532	0.27602	1.43584	0.39632
0.950592	2.80618	2.50366	0.30076	1.00585	0.30252
0.656482	2.76166	2.50368	0.274493	0.939841	0.25798
0.148526	2.81496	2.504	0.277392	1.12101	0.31096
0.155159	2.89244	2.50416	0.30936	1.25511	0.38828
0.818118	2.79252	2.50374	0.31196	0.925696	0.28878
0.0898876	2.9297	2.50416	0.27056	1.57281	0.42554
0.719222	2.80778	2.50382	0.341897	0.889039	0.30396
0.29513	2.803	2.5039	0.272016	1.09957	0.2991
0.98297	2.8242	2.50376	0.302268	1.06012	0.32044
0.548237	2.76684	2.50376	0.27116	0.970202	0.26308
0.232991	2.79124	2.50378	0.286535	1.00323	0.28746
0.892623	2.7678	2.50356	0.30109	0.877611	0.26424
0.674139	2.77824	2.5036	0.277243	0.990613	0.27464
0.343475	2.81818	2.50364	0.273673	1.14933	0.31454
0.199118	2.8592	2.5043	0.334777	1.06011	0.3549
0.999029	2.9518	2.50402	0.420168	1.06572	0.44778
1.53288	2.98534	2.50406	0.56525	0.851446	0.48128
0.977691	2.82808	2.50352	0.368767	0.880123	0.32456
0.465869	2.87652	2.50388	0.339237	1.09846	0.37264
0.441874	2.81116	2.50388	0.342089	0.898247	0.30728
0.776081	2.75654	2.5037	0.310972	0.813062	0.25284
0.66566	2.7645	2.50374	0.279693	0.93231	0.26076
0.688138	2.84048	2.50388	0.353214	0.952963	0.3366
0.893842	2.86066	2.50368	0.37595	0.949541	0.35698
0.423891	2.81164	2.50378	0.350231	0.879019	0.30786
1.06529	2.81902	2.50406	0.507447	0.620676	0.31496
0.71717	2.83192	2.5051	0.353947	0.923359	0.32682
0.677338	2.79464	2.50536	0.34984	0.826892	0.28928
0.161303	2.75426	2.50892	0.324606	0.755809	0.24534
0.671936	2.84756	2.50576	0.338514	1.00971	0.3418
0.418915	2.7781	2.50574	0.310326	0.877658	0.27236
0.816282	2.80136	2.5046	0.350149	0.847526	0.29676
0.622373	2.80266	2.50586	0.311903	0.951578	0.2968
0.44079	2.65252	2.50652	0.324463	0.449974	0.146
0.685049	2.84722	2.50512	0.346194	0.988173	0.3421
0.354931	2.8059	2.5056	0.300847	0.99818	0.3003
0.642221	2.74168	2.5052	0.262776	0.899932	0.23648
0.945737	2.77488	2.505	0.29302	0.921029	0.26988
0.719796	2.80674	2.50506	0.312783	0.964503	0.30168
0.69196	2.76472	2.50488	0.328863	0.790117	0.25984
0.167881	2.70934	2.50796	0.29926	0.672927	0.20138
0.996127	2.71964	2.5046	0.28918	0.74362	0.21504
0.576466	2.76226	2.50516	0.29948	0.858488	0.2571
0.264953	2.85932	2.50594	0.298695	1.18308	0.35338
0.900839	2.77732	2.50432	0.292705	0.93268	0.273
0.552347	2.79104	2.50474	0.28989	0.987616	0.2863
0.506396	2.7374	2.50534	0.26268	0.883432	0.23206
0.575546	2.74366	2.50516	0.260136	0.91683	0.2385
0.95563	2.71854	2.50182	0.282452	0.767279	0.21672
0.905176	2.72516	2.50456	0.272433	0.809739	0.2206
0.178269	2.76254	2.50582	0.24592	1.04392	0.25672
0.964857	2.7477	2.50428	0.318451	0.764387	0.24342
0.355506	2.82068	2.50694	0.287027	1.09307	0.31374
0.464988	2.78908	2.50534	0.261813	1.08375	0.28374
0.619763	2.73722	2.50464	0.270264	0.860565	0.23258
0.122108	2.8359	2.5075	0.255184	1.28691	0.3284
0.425597	2.76484	2.50512	0.265133	0.979583	0.25972
0.696472	2.7141	2.50482	0.227518	0.919839	0.20928
0.558435	2.73644	2.50474	0.269682	0.859159	0.2317
0.982885	2.75748	2.50442	0.28689	0.88208	0.25306
0.121198	2.8339	2.50708	0.266836	1.2248	0.32682
0.0770807	2.85622	2.50718	0.265696	1.31368	0.34904
0.584523	2.77822	2.50506	0.258193	1.05797	0.27316
0.889131	2.75414	2.50458	0.284525	0.877111	0.24956
0.186855	2.78936	2.50714	0.259131	1.0891	0.28222
0.0976341	2.86114	2.516	0.272856	1.26492	0.34514
0.695964	2.76322	2.50468	0.251651	1.02737	0.25854
0.757135	2.7578	2.5048	0.24981	1.01277	0.253
0.760021	2.72938	2.50466	0.252309	0.890654	0.22472
0.309801	2.76916	2.50526	0.246868	1.06899	0.2639
1.01595	2.67156	2.50438	0.224027	0.746248	0.16718
0.633499	2.77118	2.50482	0.285872	0.931744	0.26636
0.808785	2.73598	2.50486	0.254258	0.908999	0.23112
0.792387	2.74698	2.50452	0.272644	0.88929	0.24246
0.524082	2.72548	2.50512	0.250953	0.878092	0.22036
0.46096	2.74126	2.5049	0.248916	0.949559	0.23636
0.106687	2.78456	2.50564	0.232268	1.20085	0.27892
0.927851	2.70852	2.504	0.251118	0.814439	0.20452
0.0795088	2.76834	2.51064	0.213058	1.20953	0.2577
0.293349	2.76742	2.5048	0.227238	1.1557	0.26262
0.240329	2.7551	2.505	0.231766	1.07911	0.2501
0.490217	2.68762	2.5046	0.201707	0.907357	0.18302
0.357688	2.71434	2.50442	0.215104	0.975902	0.20992
0.0845864	2.75468	2.50664	0.206653	1.20027	0.24804
0.715265	2.70516	2.50404	0.210607	0.954953	0.20112
0.707462	2.71174	2.50454	0.221044	0.937371	0.2072
0.447688	2.70502	2.50464	0.200765	0.998082	0.20038
0.548448	2.7125	2.50492	0.208662	0.994816	0.20758
0.543689	2.71608	2.5055	0.219758	0.958235	0.21058
0.150389	2.79224	2.5106	0.209324	1.34548	0.28164
0.740154	2.69704	2.50452	0.214442	0.897773	0.19252
0.947965	2.67672	2.50404	0.20986	0.822834	0.17268
0.107123	2.73988	2.50976	0.190249	1.20957	0.23012
0.755158	2.68342	2.50474	0.200647	0.890521	0.17868
0.547257	2.69372	2.50456	0.211089	0.896115	0.18916
0.563221	2.65162	2.50438	0.19843	0.742025	0.14724
0.561576	2.65656	2.50452	0.175114	0.868233	0.15204
0.256587	2.70548	2.5054	0.184732	1.08308	0.20008
0.821204	2.6629	2.5044	0.200778	0.789428	0.1585
0.257313	2.66524	2.50462	0.165013	0.973376	0.16062
0.860417	2.63906	2.50386	0.150206	0.900096	0.1352
0.434242	2.66642	2.50462	0.165668	0.976652	0.1618
0.927909	2.6556	2.5041	0.176246	0.859595	0.1515
0.502908	2.68462	2.50436	0.173431	1.03937	0.18026
0.881603	2.64462	2.50398	0.178538	0.787729	0.14064
0.418016	2.68664	2.50466	0.175017	1.03978	0.18198
