# Supplementary material for: Pedunculopontine glutamatergic neurons control spike patterning in substantia nigra dopaminergic neurons
Source: eLife. 2017 Oct 5;6:e30352. doi: 10.7554/eLife.30352 (PMC5643088; doi:10.7554/eLife.30352)
Supplement: Figure 6—source data 1. [file elife-30352-fig6-data1.xlsx]

## Sheet: 6D
Cell1_Axon	Cell1_Soma	Cell2_Axon	Cell2_Soma	Cell3_Axon	Cell3_Soma	Cell4_Axon	Cell4_Soma
2.82294	2.82326	3.96731	3.96448	4.13873	4.14182	2.17751	2.17761
2.76886	2.76947	4.14456	4.13805	4.35958	4.35844	2.16478	2.16403
2.77331	2.77208	3.84231	3.84941	5.0226	5.03018	2.12793	2.12811
2.83913	2.84026	4.09903	4.09937	4.70898	4.70102	2.13274	2.13365
2.91937	2.91937	3.79651	3.7968	4.59939	4.60278	2.05533	2.05541
2.91903	2.91783	3.74336	3.74167	4.36414	4.36034	2.09091	2.08995
2.82326	2.8231	4.0783	4.07797	4.35426	4.35502	2.07177	2.07177
2.91019	2.91155	4.12269	4.12473	4.49357	4.49398	2.03882	2.0389
2.81341	2.81373	3.83377	3.832	4.01381	4.0151	2.07512	2.07538
2.78676	2.78629	4.30145	4.30145	4.79157	4.79294	2.52845	2.5287
2.82358	2.82279	3.93856	3.93887	4.62065	4.61851	40.1606	40.1929
2.8957	2.89637	3.65364	3.65364	4.26476	4.26803	19.4175	19.5771
2.85845	2.85943	3.70096	3.70288	4.35313	4.34858	1.94924	1.94719
5.83294	5.84112	3.66274	3.66086	4.37101	4.37905	1.75605	1.75667
43.8596	43.3651	3.4638	3.46428	4.42831	4.42243	1.87878	1.87808
19.0767	19.1131	3.49724	3.49675	4.95	4.94854	1.87645	1.87702
9.68429	9.67867	3.60828	3.60828	3.84882	3.85119	1.91799	1.9171
8.15395	8.15395	3.74364	3.74364	4.49519	4.50045	1.92367	1.92463
2.71164	2.70973	5.63761	5.64398	4.76781	4.76327	1.99952	1.99968
2.40246	2.40246	13.1718	13.1822	4.59432	4.59559	1.91608	1.91512
2.65477	2.65548	9.83284	9.82125	4.79939	4.79249	2.01719	2.01711
2.55428	2.55532	8.21828	8.22098	5.87406	5.87751
2.65055	2.64943	3.8279	3.82526	13.1648	13.1441
2.74303	2.74228	3.39443	3.39582	9.83091	9.85028
2.69585	2.696	3.58783	3.58629	8.16193	8.17261
2.73763	2.73748	3.50779	3.50926	3.88319	3.87477
2.74243	2.74243	3.64804	3.64325	3.6491	3.65791
2.85063	2.85079	3.19489	3.19816	4.08263	4.07266
2.75346	2.75421	3.23332	3.23457	3.93794	3.9367
2.78242	2.78133	3.46861	3.4662	3.78415	3.78673
		3.49138	3.49113	3.83642	3.83524
		3.40832	3.40808	3.98311	3.98692
		3.4478	3.44804	3.72912	3.73162
		3.4571	3.4571	3.53607	3.53432
		3.26968	3.27139	3.49626	3.49699
		3.7358	3.73441	3.71223	3.71113
		3.92218	3.92434	3.84231	3.84704
		3.92065	3.92003	3.60594	3.60049
				3.86518	3.86847
				3.73079	3.72884
				4.30441	4.30478
				4.75014	4.74654
				4.06009	4.05943

## Sheet: 6E
Cell1_Axon	Cell1_Soma	Cell2_Axon	Cell2_Soma	Cell3_Axon	Cell3_Soma	Cell4_Axon	Cell4_Soma
2.29106	2.29137	3.53507	3.53632	4.77281	4.77509	2.26963	2.26912
2.3204	2.31954	3.56075	3.56049	4.53063	4.53391	2.20585	2.20595
2.12902	2.12993	3.50018	3.49993	4.82067	4.81464	2.24225	2.24175
2.33285	2.33198	3.52212	3.52262	4.91981	4.92174	2.20799	2.20829
2.15452	2.15434	3.49944	3.4965	5.41008	5.41594	2.19645	2.19674
2.15119	2.15193	3.38707	3.3896	5.38445	5.37808	2.19135	2.19144
2.20129	2.2007	3.49065	3.4926	5.03373	5.03525	2.17344	2.17306
2.23015	2.23015	3.47246	3.47054	5.43006	5.42711	2.14546	2.14565
2.22025	2.22005	3.21254	3.21254	4.85625	4.85201	2.19597	2.19587
2.20429	2.20556	3.36496	3.36474	5.39374	5.40249	2.19029	2.19048
2.97601	2.97477	3.62766	3.62871	4.95246	4.94267	16.2022	16.3185
9.66931	9.69368	3.49944	3.50042	5.15677	5.16102	9.90295	9.90295
9.82704	9.82125	3.43218	3.42841	5.82343	5.82954	9.69744	9.68804
9.93246	9.92457	3.43077	3.43265	5.60161	5.60161	10.004	10.002
4.97909	4.97909	3.39674	3.39859	4.64425	4.63693	4.95688	4.94756
4.94707	4.94609	3.37815	3.37633	4.98256	4.98853	4.91207	4.91449
4.92805	4.92756	6.64628	6.65779	4.87187	4.86571	0.546412	0.546454
0.467412	0.467386	4.999	4.997	5.64653	5.65739	1.68982	1.68936
1.95335	1.95374	9.77326	9.77326	4.9505	4.95688	2.07926	2.079
2.02421	2.02429	4.99201	4.98952	5.04745	5.03525	2.0167	2.01637
2.11811	2.11802	4.95197	4.95344	5.40365	5.41419	2.06432	2.06424
		9.70497	9.72195	4.97661	4.96722
		9.93049	9.92457	5.20508	5.19859
		3.62529	3.62161	4.83465	4.84637
		3.36293	3.36361	6.40123	6.39304
		3.45925	3.45877	9.78665	9.80584
		3.53482	3.53107	9.97009	9.94629
		3.40368	3.40716	9.85804	9.88924
		3.39167	3.3919	9.77326	9.79816
		3.56964	3.5699	9.79624	9.79624
		3.47319	3.47295	9.93443	9.93838
		3.5917	3.5935	10.0301	9.98004
		3.66166	3.65925	9.83478	9.83671
		3.42161	3.42442	9.92063	9.95223
		3.32071	3.31873	5.15783	5.14086
		3.5246	3.52634	3.80286	3.80894
		3.367	3.36678	4.27022	4.2633
				4.52981	4.53309
				5.62493	5.6281
				3.79968	3.79853
				5.12926	5.12663
				4.38827	4.39329
				4.23442	4.22976
				4.18025	4.1806
				4.06537	4.0657
				4.03486	4.03454
				4.03161	4.03063
				4.05121	4.05482
				3.87958	3.87898
				4.307	4.30478
				4.16458	4.1691
