# Supplementary figures and images for: Pedunculopontine glutamatergic neurons control spike patterning in substantia nigra dopaminergic neurons
Source: eLife journal article supplement (doi:10.7554/elife.30352), 2017-10-05

Figure 1 Supplement 2 - Galtieri et al.

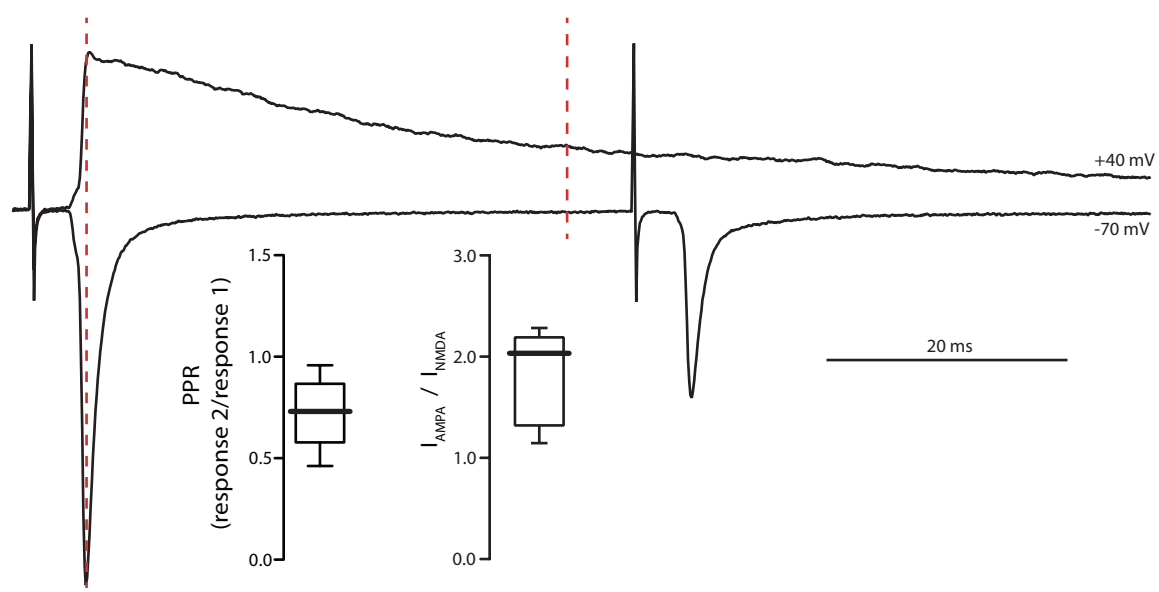

Supplement: supp [file elife-30352-supp-v1.zip]

Figure 1 Supplement 1 - Galtieri et al.

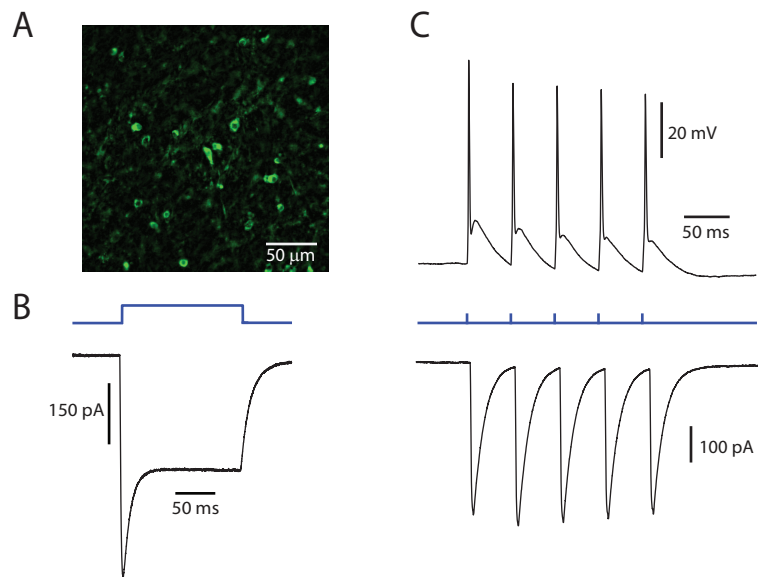

Supplement: supp [file elife-30352-supp-v1.zip]

Figure 5 Supplement 1 - Galtieri et al.

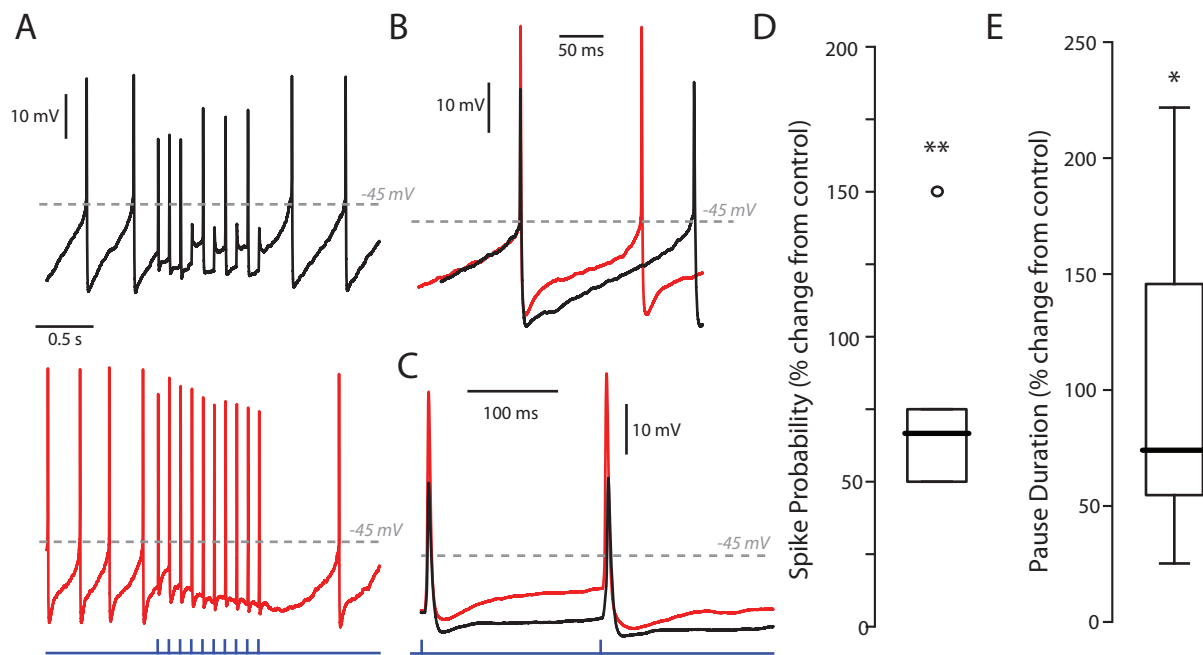

Supplement: supp [file elife-30352-supp-v1.zip]

Figure 3 Supplement 1 - Galtieri et al.

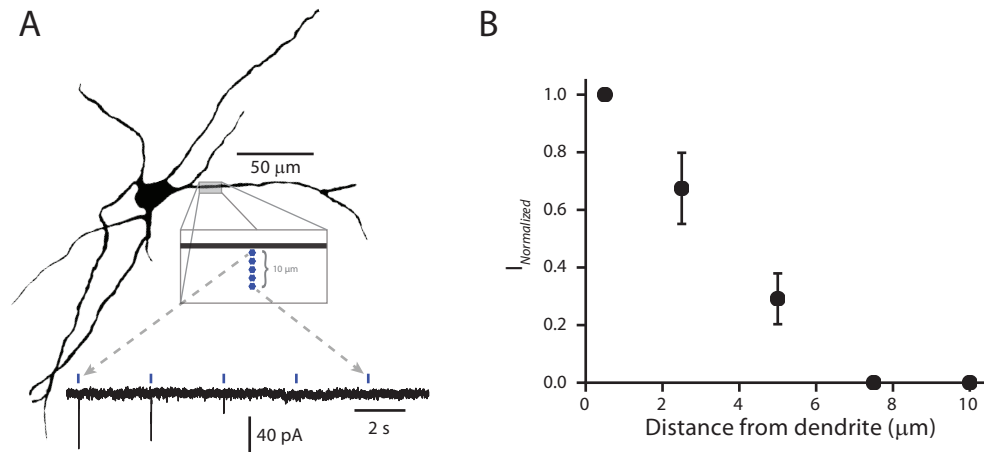

Supplement: supp [file elife-30352-supp-v1.zip]

Figure 4 Supplement 1 - Galtieri et al.

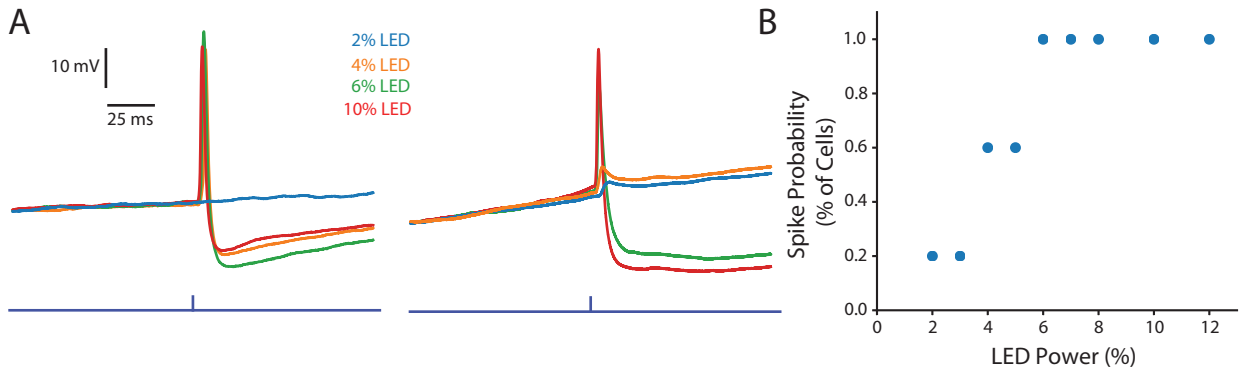

Supplement: supp [file elife-30352-supp-v1.zip]
